# Supplementary material
Source: PubMed Central journal article supplement (PMC8982752)
Supplement: NIHMS1789588-supplement-Supplementary_Figures.pdf [file NIHMS1789588-supplement-Supplementary_Figures.pdf]

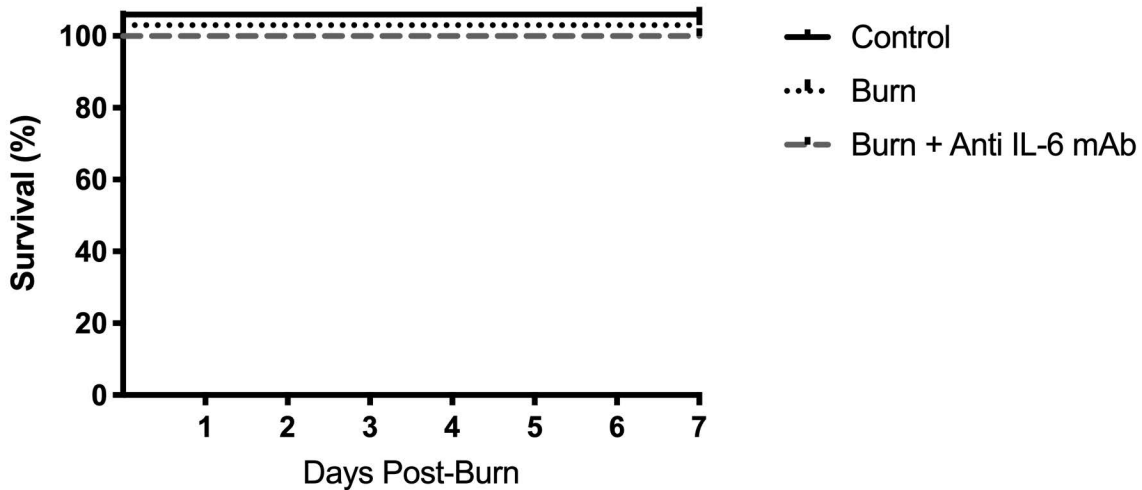

Plasma Creatinine (mg/dl)

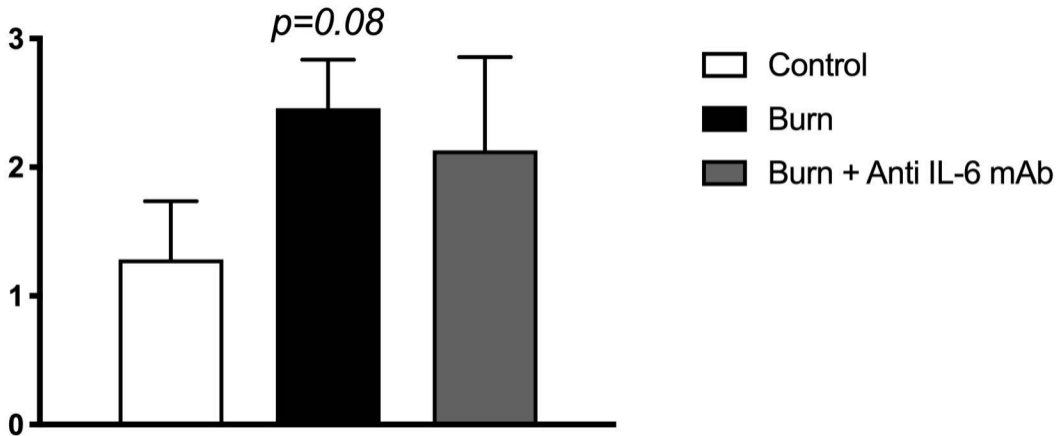

## **SUPPLEMENTAL FIGURE LEGENDS**

**Figure S1. Effect of anti-IL-6 mAb treatment on post-burn morality.** Kaplan-Meier survival curve of control, untreated and anti-IL-6 treated burn mice at 7 days post-injury; n= 7/group.

**Figure S2. Effect of anti-IL-6 mAb treatment on post-burn kidney function.** Circulating levels of kidney damage marker creatine in control, untreated and anti-IL-6 treated burn mice at 7 days post-injury; n= 7/group.
